# Supplementary material for: Measuring the tolerance of the genetic code to altered codon size
Source: eLife journal article supplement (doi:10.7554/elife.76941), 2022-03-16
Supplement: supp [file elife-76941-supp-v1.zip]

Archive with 10 entries (10 files):
- elife_poa_e76941_Transparent_Reporting_File.pdf
- elife_poa_e76941_Supplementary_file_1.docx
- elife_poa_e76941_Supplementary_file_2.docx
- elife_poa_e76941_Supplementary_file_3.docx
- elife_poa_e76941_Figure_2_source_data_1.csv
- elife_poa_e76941_Figure_3_source_data_1.csv
- elife_poa_e76941_Figure_4_source_data_1.csv
- elife_poa_e76941_Figure_6_source_data_1.csv
- elife_poa_e76941_Figure_6_source_data_2.csv
- elife_poa_e76941_Figure_1_figure_supplement_1.png
