# Supplementary material for: Measuring the tolerance of the genetic code to altered codon size
Source: eLife journal article supplement (doi:10.7554/elife.76941), 2022-03-16
Supplement: supp [file elife-76941-supp-v1.zip › elife_poa_e76941_Figure_2_source_data_1.csv]

XYZZ - Luminescence @ OD0.3
A-2	0	0	0	0
C-2	0	0	0	0
D-2	-0.459621394	0	0	0
E-2	-1.134670512	0	0	0
F-2	-0.1684340715	-0.1765805679	-0.009320671233	0.04242793823
G-2	3.013219494	1.995398339	1.354655628	0
H-2	0	0	0	0
I-2	-0.07591703512	-0.08296678448	0.01223286076	0.0491813544
K-2	-0.04469912497	-0.06062102278	-0.007932202113	0.03651360509
L-2	0.003414537761	-0.00753893285	-0.001251028023	-0.002583747503
M-2	0	0	0	0
M2-2	0.005296860919	-0.001442507912	-0.005995077638	0.006741504124
N-2	-0.07676831468	-0.08774823758	-0.07949037208	-0.03902540939
P-2	0.3610477857	0.3712948228	0.3490560406	0.4445229277
Q-2	1.565923051	1.315988843	1.018975078	1.024149865
R-2	0.5534474558	0.6661857917	0.618072806	0
S-2	0.07496435956	0.04068913867	0.09250099909	0.1529424121
T-2	0.279071221	0.2013348908	0.254800942	0.2434085907
V-2	0	0	0	0
W-2	0	0	0	0
Y-2	0	0	0	0
XYYZ - Luminescence @ OD0.3
zC-3	-0.06354001185	-0.2196320988	-0.1854136498	-0.1555174143
zD-3	-0.3195167972	-1.078201153	-1.227623447	-1.413211747
zF-3	-0.02687598482	-0.06876018644	-0.1115170218	-0.123972747
zH-3	0.01733604903	-0.05934893367	-0.0780427764	-0.08803742782
zI-3	0.003584955392	-0.007667329301	-0.03788758125	-0.06182372132
zL-3	-0.01532264888	0.03178580581	0.007025463176	-0.008000828025
M2-3	0.01335291936	0.01432623062	-0.001154769493	-0.0166327182
zN-3	-0.05263667113	-0.1435645097	-0.08372875967	-0.1040144534
zP-3	3.233966645	3.102766522	3.036789638	2.639850668
zQ-3	0.6278363832	0.528054438	0.5550295967	0.576765881
zR-3	0	0	0	0
zS-3	0	0	0	0
zT-3	0	0	0	0
zV-3	0.04432952104	-0.0002763496545	-0.03010108385	-0.0287393387
zY-3	-0.2793361466	-0.3574884129	-0.3811718112	-0.3843249949
XYZZ - Growth Metric
A-2	0.241788572	0.1225350639	0.1289509487	0.1012155947
C-2	0.2440628044	0.2419400083	0.1990633162	0.1582942575
D-2	0.4102141815	0.6263291686	0.437979691	0.3282399065
E-2	0.5763965485	0.8339926723	0.6431618464	0.6409480362
F-2	0.8189242665	0.864560511	0.8516536015	1.098088442
G-2	0.4934064388	1.49593898	0.8499213377	0.8340460547
H-2	0.109183239	0.1398306258	0.1622975794	0.127109611
I-2	0.7161528325	0.9196672268	0.8679819775	0.9394103006
K-2	0.9922539639	1.11618862	1.059247852	1.024753094
L-2	0.8545222128	1.065143028	1.055576342	1.025988146
M-2	0.4243107799	0.3444924551	0.6394195551	0.4209584818
M2-2	0.8291699804	0.9467642957	0.8010512571	0.8605560344
N-2	0.7057082033	0.6131526748	0.5927243556	0.7725890636
P-2	0.8309999228	0.8607115731	0.6897502168	0.8897587775
Q-2	0.3588349864	0.2825930855	0.4156945392	0.612829038
R-2	0.2637859286	0.2737050263	0.326101727	0.3362240034
S-2	0.9780134699	1.191268228	1.137189925	1.083668101
T-2	1.054550319	0.9940177548	0.931398745	1.012408536
V-2	0.1438717901	0.07764289595	0.08617946957	0.06049043449
W-2	0.04944443095	0.0475491346	0.04730532046	0.04358177665
Y-2	0.1668361616	0.1531370616	0.1857956249	0.1397211358
XYYZ - Growth Metric
zC-3	0.624118263	0.5934490838	0.6340211085	0.7767719998
zD-3	0.548593954	0.5484009117	0.5487561745	0.591110318
zF-3	0.7904757081	0.7705809534	0.8337061244	0.7566854063
zH-3	0.9505915715	0.9801889273	0.9853290264	0.9742882362
zI-3	0.884853728	0.8556836385	1.006995958	0.9295688841
zL-3	0.792702999	0.6855609526	0.7900634752	0.7177768424
M2-3	0.9586342745	0.9749508751	0.9994233767	0.8834557092
zN-3	0.9227304	0.8361568442	0.9612288982	1.135497298
zP-3	0.5216983669	0.5714443532	0.6243111831	0.5667885254
zQ-3	0.7389312601	0.7200175922	0.6529360405	0.7050149742
zR-3	0.09817652415	0.09244267859	0.08584018658	0.07871702609
zS-3	0.1187862776	0.1292004367	0.1137291608	0.113878406
zT-3	0.1232238382	0.1134524783	0.1211413697	0.1158525377
zV-3	0.6931592617	0.6903640974	0.8118300451	0.7935685098
zY-3	0.8234485955	0.862614219	0.9766978061	0.8392064867
