# Supplementary material for: Measuring the tolerance of the genetic code to altered codon size
Source: eLife journal article supplement (doi:10.7554/elife.76941), 2022-03-16
Supplement: supp [file elife-76941-supp-v1.zip › elife_poa_e76941_Figure_3_source_data_1.csv]

Log fold change Phage titer
	AGGG	CGTT	GGGG	CCGG	CAGG	TCGG	ACGG	CGGT
A	0.83	-8.09	-1.65	-8.56	-1.25	-9.07	-8.23	7.56
C	0.693	1.39	-0.635	-4.61	-0.693	-0.664	1.1	-1.35
D	-3	-3.91	-5.24	-6.32	-3.22	-4.61	-6.44	4.79
E	0	-13.8	-7.82	-7.82	-5.17	-6.32	-6.57	2.3
F	0.693	1.25	0.405	0	-1.29	-2.3	-3.22	7.82
G	-2.41	-7.82	3.22	-7.82	-4.61	-6.57	-13.8	-13.8
H	9.21	0	-3.51	-2.53	7.13	-3.91	-0.654	9.21
I	-7.13	-13.8	-13.8	-13.8	-13.8	-8.52	-4.61	-13.8
K	7.13	6.21	7.82	3.22	7.82	7.82	5.62	9.21
L	7.04	-13	-13	-13	4	-13	-13	-13
M2	3.08	-13	-13	-13	-13	-13	-13	-1.51
N	-13	-13	-2.4	-13	-13	-13	-13	-13
P	-13	-13	-13	-13	-13	-13	-13	-13
Q	8.42	-13	-3.5	-13	7.51	-1.19	-13	-13
R	9.21	-1.35	-6.44	-5.95	-13.2	-6.21	-6.21	9.21
S	9.21	1.5	0.693	7.13	7.82	2.14	-0.693	9.21
T	-1.29	-7.82	-4.61	-5.2	-7.42	-7.13	-5.26	-3
V	-2.3	-7.82	-3.91	-7.13	-7.82	-7.42	-6.21	4.32
W	9.21	-8.52	7.82	-3.51	-0.693	-4.61	-3.51	9.21
Y	4.61	3.22	4.32	5.52	7.82	7.82	3.4	-13.8
