# Supplementary material for: Measuring the tolerance of the genetic code to altered codon size
Source: eLife journal article supplement (doi:10.7554/elife.76941), 2022-03-16
Supplement: supp [file elife-76941-supp-v1.zip › elife_poa_e76941_Figure_4_source_data_1.csv]

ALS	A-AGGG	C-CGGC	C-TAGA	D-AGGG	D-CGGC	E-AGGG	E-CGGC	E-TAGA	F-CGGC	F-TACA	F-TAGA	G-AGGG	G-GGGG	G-TAGA	H-AGGG	H-TACA	H-TAGA	I-AGGG	K-AGAA	L-AGGG	M-AGGG	N-AGGG	P-CCGG	Q-CAGG	R-AGGG	R-CGGC	R-CGTT	S-AGGG	S-CGGC	S-TACA	S-TAGA	S-TCGG	T-ACGG	T-AGGG	V-CGGC	W-AGGG	W-GGGT	Y-TACA
AAA	-1.6484633702904614	0.41090154553862523	-1.1513974913530105	0.6038661702764672	2.8077795291075747	-0.05886635618510475	4.0884151121299865	0.002053002625264733	-0.940030719177228	2.034605318423448	0.6661813439507391	-2.4929236698553274	1.653865775645651	-4.137571266066611	1.2879411428687284	-1.140639036633464	-2.6249494840794494	0.052117768481503214	3.4436120046965315	0.3245112386403822	-0.027367728582025224	0.1969982712098875	-0.5446669113074987	5.8148364176515965	-1.1157485709110968	2.5917431804739475	0.14493576684839332	-0.29896522780633517	-1.3391456460026967	3.379615561637162	0.05503628066638492	-0.4432514437743026	-0.7209290281500177	-0.9659890400201016	-0.21194963407226708	-2.9387536534654095	0.38126799955754476	4.446263209866948
AAC	0.14329609893759349	0.41090154553862523	0.05257531297292576	-0.3405954385643843	-1.3221559782172285	-0.5051534588135242	-1.498833546270263	-0.05720968072366091	-0.940030719177228	-0.6734448826787621	-0.026965836609206224	-2.0874585617471633	-1.3318161620548385	-4.137571266066611	1.170158107212345	-1.140639036633464	-1.8364921237151794	0.2456969058477647	-0.668947006988902	0.3245112386403822	-0.027367728582025224	0.1969982712098875	-0.5446669113074987	-0.7204048533620618	0.8766815937791093	-2.7711127072116604	-0.058773290237163406	2.696767045747656	0.04714871511719382	0.005605078125046907	4.3337835658862645	4.351712313846445	-1.8195413168181274	-0.9659890400201016	-0.21194963407226708	-2.9387536534654095	3.4723104529158606	4.454681780332543
AAG	-3.4402228395185164	1.1040487260985705	0.13526702881803904	0.2720128795115489	-3.958531142612548	0.07081146712342778	1.1642192889012113	-0.21136036055091928	-0.940030719177228	1.7500928207329463	-1.9240858214950876	-2.1480831835635983	-1.1086726107406288	-3.4444240855066655	-1.64989715226636	-1.140639036633464	-2.442627927285495	-0.07959185103830695	-1.0937550779401972	0.7945148678861178	-0.027367728582025224	0.1969982712098875	-0.46260195825319456	4.316547749051567	0.35755716719842334	-1.6079618974059797	0.17484156094434178	-1.4776202241479814	1.8773744651730448	-1.3632975402829743	-3.4106996221333414	-0.9540770675402933	-0.06883031702919838	-3.530938397481638	-0.9050968146322124	0.06054368625307748	0.38126799955754476	-0.15248640831822077
AAT	-3.41205196255182	0.41090154553862523	-0.42926277391981277	-0.12702133826632514	-3.898177416579451	-0.7744863925971086	1.7027507814878766	-0.9877173139811021	-0.940030719177228	-1.3665920632387074	-1.9728759856645195	-1.2607799885626954	1.133969446286383	-4.137571266066611	1.0647975915545187	-3.337863613969683	-0.16433552686049382	-0.008260225229504875	-0.9468777419449179	-1.6213989104149311	-0.027367728582025224	0.1969982712098875	-0.4460363078658714	-0.02725767280211657	0.27054579020879377	-3.524884509588041	-0.058773290237163406	-2.7059103361246235	1.02797796812892	-5.8866105078711115	-1.3312580804535057	0.14453522112781655	-0.027781847590072337	-0.9659890400201016	-3.6131470157344223	-1.8401413647973	0.38126799955754476	1.1284474371438435
ACA	-2.992198116991556	-0.28224563502132005	0.6121911009083483	-0.9647497476373782	-3.1547374419655387	-0.28200990749931465	-1.786515618722044	0.7595903926761192	-0.940030719177228	-0.6734448826787621	-0.026965836609206224	-2.310602113061373	-0.9263510539466744	-4.137571266066611	1.757944772114464	-3.2200805783133	-0.013819004822361352	0.16863552366868198	1.985858679594496	0.3245112386403822	-1.2060227249236712	0.1969982712098875	-0.5446669113074987	-2.1066992144819525	0.963692970768739	-0.6916711655318246	0.3466918178710012	0.7508568966923427	-1.874663882359059	-1.1044359063666855	-2.024405261013451	-1.9836964847214515	-0.027781847590072337	-0.9659890400201016	-0.21194963407226708	0.09379259321129763	0.38126799955754476	-1.356459212644157
ACC	-2.341610550850407	0.41090154553862523	1.3053382814682937	-0.6770676751855972	-1.7276210863253931	-0.2820099074993145	-2.4796627992819893	-0.16103874079663413	-0.940030719177228	-0.6734448826787621	-0.026965836609206224	-0.7011642006272726	0.5675739713655816	-4.137571266066611	2.674235503988619	-1.140639036633464	-2.8480930353936595	-0.004114252550742284	-0.09358286208533999	0.3245112386403822	-0.027367728582025224	0.1969982712098875	-0.5446669113074987	-0.7204048533620618	0.27054579020879355	-0.6916711655318246	-0.058773290237163406	-2.2232138800804693	-0.6459984654427515	0.8879942583235209	-1.2667195593159344	-2.2350109130023577	-0.7209290281500177	-0.9659890400201016	-2.291391175752103	-2.9387536534654095	0.38126799955754476	-0.6633120320842116
ACG	-3.41205196255182	-0.9753928155812653	0.6992024778979781	-0.6080748036986457	-1.3221559782172285	-1.8914478199334148	-1.786515618722044	-0.15214979337938817	-3.504980076638765	-2.752886424358598	-0.026965836609206224	-2.647074349682586	1.3487273932575379	-4.137571266066611	-2.0531523147237216	-2.7500769490675645	-4.23438739651355	0.026494617464468566	-1.2567336718910207	-0.31147752807961443	-0.40206117802343594	0.1969982712098875	-0.5446669113074987	-2.9176294306982813	0.27054579020879377	-0.6916711655318246	-1.8913547539854734	-3.8949066862610024	-1.6159933762887675	-4.048874885533126	-2.7175524415733965	-2.340371428660184	-0.12801295120859563	-3.363884312818472	-0.21194963407226708	-0.4798224900806702	-1.4104914696705102	-1.6749129437626915
ACT	-2.747075658958571	-1.1472430725079243	1.3053382814682937	-0.27160256707743285	-4.7593637974024166	-0.28200990749931465	-1.0933684381620985	-0.2579675544436098	-0.940030719177228	-0.6734448826787621	-0.026965836609206224	-2.4929236698553274	0.41162472990240856	-4.137571266066611	1.170158107212345	-1.140639036633464	-2.8480930353936595	0.19282274928268553	-0.09358286208533999	-0.7741010500277274	0.7458221596514566	-0.496148909350058	-0.5446669113074987	-0.7204048533620618	0.27054579020879377	-3.0895664383301953	-1.8505327594652183	-4.137341693066182	-1.051463573550916	-0.7542334769335705	-1.3312580804535057	-2.7458365367683486	0.15453970920388235	-0.9659890400201016	-3.6459368385574136	-2.2456064729054646	-3.0844679032421816	-2.368060124322637
AGA	-3.1525407670667356	0.41090154553862523	0.17035834862930918	-0.5100135905224309	2.8054352155699895	-0.1766493918414882	-0.3395966357857186	0.14530697228473594	-0.940030719177228	1.0129540708914666	-0.026965836609206224	-2.7806057423071087	0.35458279151539007	-0.635497089828077	-2.2833505690178213	-3.337863613969683	-1.015511571645349	0.17662853506404452	-1.2814262844813922	-0.5627919563605205	-0.19442181324519142	0.1969982712098875	2.2510888702138168	2.0426274821575015	0.27054579020879377	-1.38481834609177	0.05660878388168193	-3.4431175064785995	0.40382365905592627	-2.3764920777967324	-1.3312580804535057	-2.7458365367683486	-1.5318592443663466	-1.6591362205800468	-0.21194963407226708	-1.3293157410313095	0.38126799955754476	-2.914603830690707
AGC	-0.5498510816223519	0.41090154553862523	-1.092556991330077	0.3345332364928827	-3.5786971327098676	0.164277195129105	-0.3049110777978284	0.0704036133322707	-3.019472260857064	2.5046089476691833	3.130034584540907	-1.7997764892953823	2.1806068547175412	-1.8995246942101363	-2.0793546871177453	-2.644716433409738	0.18320606915507445	0.18992868864520235	-1.3287706857592008	0.6121933110921631	-0.02736772858202534	0.1969982712098875	0.1484802692524466	0.9972466437122712	0.27054579020879377	-1.38481834609177	0.09614929236867689	2.696767045747656	-1.4878628721069596	-0.09283499468820548	-2.4298703691216152	-1.7869861904753974	-0.7209290281500177	-1.6591362205800468	-0.9050968146322124	0.12316052696988264	-0.024197108550619646	-2.2214566501307615
AGG	-2.9012263387858295	-0.9472219386145689	-0.018435722670263055	-0.06396320229918832	-4.547676345804097	0.6735015375281219	-2.6515130562086484	0.0022844858939161444	-2.885940868232541	-1.1197319853071817	-4.275461078658565	-2.9784314856370284	-0.37980734757860435	-3.038958977398501	-2.297658961791206	-4.77822519635985	0.09720369936504324	0.20972822341771247	-1.055619615747699	0.05164425197374204	0.16678828585893224	0.04284759138262903	-0.32519308888225135	-1.75002427054322	1.5233087587041618	-3.4642598877716058	0.10511456486795327	-4.696496049016182	1.5352257705470267	-1.25207190517275	-3.277168229508819	-2.4356816084645088	0.039200972968855025	-4.261825906024431	-3.3689500552223803	0.651074454183965	-1.7548688857988364	-2.711004875449467
AGT	-4.031091170958043	0.41090154553862523	0.5868732929240584	-0.16624205141960643	-4.595519988369499	-0.28200990749931465	0.17959723765078886	-0.034433015798231756	-2.549468631611328	-0.4503013313645523	-2.6296555220535898	-4.15115174645886	-1.451960473896902	-0.8794747280451285	-1.0514579232480337	-3.848689237735674	-3.5412402159536045	-0.05751206544634484	-1.3625405165006885	0.1602081873491061	-0.3060811310510458	0.8901454517698328	-0.5601710978434639	-4.0526093635372655	0.6760108983169579	-2.365647599103496	0.36774522706883334	-3.1380436913149494	-1.2056142533781742	-0.9037652109045343	-2.7175524415733965	-1.6960144122696708	-2.107223389269908	-0.9659890400201016	-4.040591030561362	-0.5183855248149805	-4.073079296695963	-2.7427535737640474
ATA	-3.727904911970297	0.41090154553862523	-0.36863815210337797	0.46236660800276763	-2.8482122817122777	0.3057767574028045	-1.786515618722044	0.04881622239386002	-2.885940868232541	-2.8706694600149816	-1.9728759856645195	-1.394311381187218	1.484447623687604	-0.8631255900435991	-3.4215890584436055	-3.337863613969683	-3.5412402159536045	0.14122979949659856	-1.0800778526327435	0.6121933110921631	-0.027367728582025224	0.8901454517698328	-0.5446669113074987	-0.7204048533620618	-0.08612915372993854	-3.1555244061219927	-0.3952455268583763	-4.917545100704344	-1.7744637172605424	-4.664319123021491	-1.73672318856167	-2.928158093562303	-0.4332469556982367	-4.991340730755251	-1.5982439951921577	-3.631900834025355	-3.9362201139787656	-2.272749944518312
ATC	-1.6484633702904614	-0.28224563502132005	-0.5917817034175876	-0.6230004539153213	-3.734155857197141	-0.6874750156074789	-4.137890875885521	-0.10426222499455229	-0.940030719177228	-0.6734448826787621	-0.026965836609206224	-1.7997764892953823	1.7592262913034773	-1.6434479611736863	-2.1816934003466555	-1.3076931212966303	-1.3440156386173852	0.20139716326689	-0.4990479701935044	-0.7741010500277274	-0.027367728582025224	0.1969982712098875	-0.5446669113074987	-0.7204048533620618	0.7013287063012477	-2.99425625852587	0.3865377264182007	-3.316948110295146	-2.255436377876852	-1.414590834670525	-1.3312580804535057	-2.982225314832579	-1.414076208709963	-0.9659890400201016	-2.1578597831275803	-1.3293157410313095	0.38126799955754476	-2.4550715013122666
ATG	-2.254599173860777	-0.3394040488612686	-0.06805267481568911	-0.2583573403274121	-4.390208913350846	1.6025312951797066	-1.786515618722044	-0.076627851450345	-1.6331778997371733	-3.969281748683091	-0.026965836609206224	-3.303853886071656	1.6606850909177058	-3.4444240855066655	-2.3691896129306276	-2.526933397753355	-4.23438739651355	0.08578014744187448	-1.199262317976542	-0.6953201721746132	-0.027367728582025224	0.05039479701801213	-0.4465490553489754	-3.8558990692912114	-0.24671072388748752	-2.5374978560301553	0.3689975753852993	-3.169701011185641	-1.6575993771212314	-1.6107057135968155	-2.940695992887606	-0.9540770675402933	-1.2115519445984886	-4.1229894611702145	-1.8213875465063676	-0.9238506329231448	-3.197610559342063	-4.368720788149359
ATT	-3.788529533786732	-1.3382983092706338	-0.08095607965159704	0.016079505374348147	-4.3081637018792245	0.22881571626667618	0.11965420168375518	-0.2024935861838968	-3.3823777545464324	-1.7720571713468718	-0.026965836609206224	-2.310602113061373	-1.6194982345066196	-3.038958977398501	-1.8421034682928563	-2.526933397753355	-0.9762908584920679	0.2607743548585016	-1.4071178689228023	-0.11732151363865688	-0.7205149091419707	0.1969982712098875	0.03069723359606323	-2.666315002417375	-0.1712869620702456	-2.6504847194230456	0.3729776801419261	-4.8752214036297845	-1.8442235579784947	-5.516683083683452	-0.6381108998935604	-2.1172278773459743	-0.7209290281500177	-3.6740392411223115	-2.7376782783805225	0.2340782329013843	-0.7173442891105649	-0.8864555833984215
CAA	-3.383064425678568	1.0676810819276956	0.05257531297292555	-0.414703410718106	4.702391603854827	-0.28200990749931465	1.432360206146157	-0.291430413416489	-0.2468835386172827	-0.6734448826787621	-0.026965836609206224	-1.7997764892953823	-1.0729545281385497	-4.137571266066611	2.268770395880455	-2.2392513253015736	-3.5412402159536045	-0.2067772393730806	3.8851637753857142	0.3245112386403822	1.3589266325378655	0.1969982712098875	-0.4875084974675501	-0.7204048533620618	0.27054579020879377	2.583756828841297	-0.7519204707971087	1.3104726846277652	2.216202415486717	0.11480437009003898	-0.8612544512077702	1.0608259530019715	-1.126394136258182	-0.9659890400201016	3.8410767788191027	-2.9387536534654095	0.38126799955754476	2.332420241469779
CAC	0.14329609893759349	-0.6877107431294844	0.006055297338032724	-0.1662420514196063	-2.2384467100913836	0.005672164952466374	5.696728797351806	-0.2555407895154214	-0.940030719177228	-0.6734448826787621	-2.2241904139454256	-1.106629308735437	-1.149494605260884	-4.137571266066611	-0.3380260715165824	-1.140639036633464	-3.5412402159536045	-0.2583160142899977	-0.09358286208533999	0.3245112386403822	0.6657794519779201	0.1969982712098875	-0.5446669113074987	3.5137016512351975	0.27054579020879377	-0.6916711655318246	0.6343738903227819	3.389914226307601	1.3431204379437987	0.37716863455752997	-3.7291533532518764	0.3676787724420261	-0.027781847590072337	-0.9659890400201016	-0.21194963407226708	-2.9387536534654095	0.38126799955754476	0.43530025658389815
CAG	-3.383064425678568	-0.4164951605312835	0.03411325013319037	0.05117082518561821	-3.4735430173379815	-0.5774741203931504	-3.2334346016583693	0.13629316529261806	-0.2468835386172827	0.42516740598934755	-0.026965836609206224	-3.3402215302425313	-0.3706339064269091	-3.4444240855066655	-1.3919381812667853	-3.5385343094318347	-0.03384933232973107	0.166945934512644	-1.216766411483955	-0.8541437577012638	-0.027367728582025224	1.583292632329778	-0.033841287541508114	-2.666315002417375	-0.13491931789937064	-2.8317373290280954	0.2004463175508561	-1.7458842107426606	-0.6459984654427515	-0.210618030344589	-3.1230175496815606	-1.4240806967860289	-1.9736919966453856	-2.837791216921693	-2.7376782783805225	-2.427928029699419	0.38126799955754476	-1.7619243207523212
CAT	0.14329609893759349	-0.28224563502132005	0.8998731733601294	0.1056916640640354	-2.9833558252099186	-0.22138528568287966	-1.6529842260975214	-0.01928857416783081	-0.5345656110690636	0.019702297881183186	3.6292428352151815	5.301734724106372	1.910776189430678	-2.5281333536325103	7.878242191065414	-1.140639036633464	0.48618573397786474	0.005689213296818596	1.920163420329101	2.521735815976602	-1.1259800172501349	0.1969982712098875	0.1484802692524466	-0.7204048533620618	0.27054579020879377	-1.38481834609177	-1.5628506870134373	9.224724963370207	2.3674995862632615	2.136138280962594	-2.024405261013451	2.9956862658706997	-0.7209290281500177	-1.6591362205800468	-2.0837518109738586	-2.5332885453572453	1.0744151801174902	3.344021153148259
CCA	0.14329609893759349	0.41090154553862523	0.1013654771423577	-0.6770676751855972	1.7135090056721336	-0.9751570880592599	-1.0933684381620985	0.311565670149159	-2.0386430078453377	-0.6734448826787621	-0.026965836609206224	-0.7011642006272726	0.5698708428892909	-2.345811796838556	1.9810883234286738	-1.140639036633464	-1.3440156386173852	-0.14136391991121836	-0.9759720422838137	0.3245112386403822	-0.027367728582025224	0.1969982712098875	-0.5446669113074987	-0.7204048533620618	-0.08612915372993854	-0.6916711655318246	-1.9305754671387547	-2.5813476134828615	-1.5622891973169066	0.11480437009003898	-0.6381108998935604	-1.4240806967860289	-1.126394136258182	-1.6591362205800468	-0.6393936488992069	-2.9387536534654095	0.38126799955754476	-2.9658971250782575
CCC	-1.8716069216046713	0.41090154553862523	-0.48642118775976123	-0.6770676751855972	-0.6290087976572833	-0.28200990749931465	-2.4796627992819893	0.11288403551186477	-2.0386430078453377	-0.6734448826787621	-0.7201130171691515	-0.7011642006272726	-1.2830259978854066	-4.137571266066611	2.268770395880455	-1.140639036633464	-4.23438739651355	-0.12404361360914078	-0.7867300426452853	0.3245112386403822	1.0712445600860843	0.1969982712098875	-0.5446669113074987	-0.7204048533620618	-0.18143933353426345	-0.6916711655318246	-0.058773290237163406	2.696767045747656	0.04714871511719382	1.9866065469916305	-0.6381108998935604	-2.5226929854541384	-0.027781847590072337	-0.9659890400201016	-0.21194963407226708	-2.9387536534654095	0.38126799955754476	-0.6633120320842116
CCG	-3.8640370862948776	-0.6877107431294844	-0.059902670453764593	0.526905129140339	-2.015303158777174	-0.1568467645453084	-4.3122442630302995	-0.3997638294939769	-2.549468631611328	-3.7644873360370776	-2.9714048157756467	-2.310602113061373	-1.3667542134161192	-4.137571266066611	-1.7565812948546944	-1.140639036633464	-4.23438739651355	0.14009677637025816	-1.4373176087864348	-0.6563180143713438	-0.7205149091419706	2.6819049209978876	-0.5446669113074987	-2.3298427657961622	0.14538264725478767	-0.6916711655318246	-1.445067651357054	-0.5221087791205449	-1.1315062812244525	0.7338435784962624	-2.7175524415733965	-2.340371428660184	-1.9530727094426499	3.9849847100180873	-4.255000901906818	-1.552459292345519	-2.9145688664467846	-3.882187856952412
CCT	0.14329609893759349	-1.1125939370947504	1.9984854620282388	-0.6770676751855972	-4.163737571943961	-0.7928355312653051	-1.786515618722044	-0.024464186460415902	-1.6331778997371733	-0.6734448826787621	-3.8111554705274675	-1.2119898243932634	1.7354863040004043	-3.4444240855066655	0.8824760347605644	-1.8337862171934094	-3.5412402159536045	-0.4656388732893697	1.2927114990345507	-1.0617831224795085	-0.027367728582025224	0.10998689422025766	-0.5446669113074987	-0.7204048533620618	-0.8280664984593159	-0.6916711655318246	0.6343738903227819	1.598154757079546	0.04714871511719382	0.6003121858717398	-0.6381108998935604	-1.2905493041615062	-0.4332469556982367	-0.9659890400201016	-2.1578597831275803	-2.2456064729054646	3.040528036490323	-0.6633120320842116
CGA	-3.9510484632845073	0.41090154553862523	-0.06952738382797406	0.2102355198153056	3.522714612661142	0.04341249293531346	-1.0933684381620985	0.06955363453056637	1.012659116863464	-2.2138899236259113	-1.8187253058372612	-3.9200400254954735	1.5653352828267046	-1.6526646162786103	-2.2638290972728012	-2.2392513253015736	-2.6249494840794494	0.28987550378538984	-1.7030207745194406	0.6811861825791147	-0.7205149091419706	0.1969982712098875	0.8416274498123919	-1.4135520339220071	-0.31724087469332546	-0.845821845359083	0.1538536160521201	1.0873291333135555	1.769346754139295	-3.9922792179094913	-3.203060257355097	-2.7458365367683486	-0.7209290281500177	-2.064601328688211	2.1005857897749465	-2.6510715810136287	-0.5454940321839058	-2.2139094444953784
CGC	0.14329609893759349	0.41090154553862523	-0.13811449349154548	0.23922305668855803	-3.444769691762273	-0.12785922767205615	-3.8014186392643086	0.10362027972357703	-2.0386430078453377	1.2724652663765512	-0.8742636969964098	-2.898388777963492	1.0327922336875393	-4.137571266066611	-2.781085611369082	-1.8337862171934094	-0.030373433409235456	-0.1275068852497922	-1.047456305108538	-0.05848101361572359	-0.3682943155526185	0.6024633793180518	-0.5446669113074987	-0.7204048533620618	-0.8280664984593159	-0.6916711655318246	0.18445701964378386	2.696767045747656	-1.2944097521613054	1.2934593664316851	-3.3461611009957704	-1.484705318602464	-0.027781847590072337	-0.9659890400201016	-2.226852654614532	0.2238302551104042	0.38126799955754476	-2.332469179219934
CGG	-3.967577765235718	-0.28224563502132005	0.1697824776084997	0.09612221304788456	-3.6968116390044274	-0.2820099074993145	-4.037807417328539	-0.10279629379674232	-4.495378780666642	-3.040568496810379	-3.637883749253431	-2.983546586303799	-1.496544084665522	-1.3649825438268295	-2.71025955880047	-2.7500769490675645	0.006939356057196449	0.09773210952646004	-1.584711284520811	-0.003992828331653628	-0.027367728582025224	-0.49614890935005784	-2.1723582640509496	-3.7035583447091924	-0.20487790650628096	-1.5389690259190283	0.23879761434386476	-3.1525577341992035	1.5922996471017554	-1.8949572509518071	-2.5840210489488737	-2.340371428660184	-3.020879073506058	-3.7385777622598826	-2.87453746109772	-0.9928435044100965	-3.589023913994577	-2.8227962814375838
CGT	-0.5498510816223519	-0.28224563502132005	-0.36863815210337797	0.016079505374348147	-4.364443778139235	-0.3773200873036393	-3.9265817822183147	-0.10036358457889477	-3.2426158121712736	3.046206230101928	-0.8154231969734764	-3.6968964741812638	1.502561326486751	2.1066187503724874	-1.7723296518228338	1.4288250011825994	-0.14841108396196578	0.1344480696944009	-1.515982227847347	0.3986192107941043	0.5162477180069563	-0.49614890935005784	-0.6092054324450698	-3.3106720188078884	-0.42260139035115174	-2.4495290830841983	-1.3805291302194826	-1.2152559596804902	-0.6359816871992803	0.19484707776357552	-2.7175524415733965	-2.1972705850195107	-2.5535104918983276	-4.629550686149748	-2.9199998351744774	0.33208191033350215	3.0380249062722045	-3.7078344698076346
CTA	-3.1525407670667356	0.41090154553862523	-0.3287922435561782	0.6774779876197132	-1.632310906521068	-0.5696919799510956	-3.7324257677773574	0.2809635269510975	-3.2426158121712736	-0.6734448826787621	-2.4248611094075767	-2.7806057423071087	1.5949232400122009	-4.137571266066611	1.2879411428687284	-1.140639036633464	-3.5412402159536045	-0.11122893598148939	-1.6275132220112951	-0.08095386946778213	-0.027367728582025224	0.1969982712098875	-0.5446669113074987	-4.246765377978223	0.27054579020879377	-1.9909541496620855	0.21548576188247698	-4.300828937234271	-1.5622891973169066	-3.8826903661421444	-2.024405261013451	-2.8103750579059197	-1.414076208709963	-0.9659890400201016	-0.21194963407226708	-1.4346762566891356	0.38126799955754476	-3.841365862432157
CTC	0.14329609893759349	-0.6877107431294844	0.3890475495941385	0.13386254103073159	-4.122481455428609	0.9707530609960535	-0.40022125760215327	-0.06077539053397285	-3.424937368965228	-0.6734448826787621	-0.026965836609206224	-2.0874585617471633	0.11745299822644018	-4.137571266066611	-2.490550469934895	-1.140639036633464	-2.442627927285495	0.12214779161274944	-1.5263972388401237	0.3245112386403822	-0.43283283669018974	0.8901454517698328	-0.5446669113074987	-0.7204048533620618	-1.1157485709110968	-3.2306450365901007	-0.058773290237163406	-1.5798990732683995	-1.7503414288198462	-0.45574048837757397	-0.6381108998935604	-2.052689356208403	-1.6372197600241727	-0.9659890400201016	-0.9050968146322124	-1.3293157410313095	-0.7173442891105649	-1.356459212644157
CTG	-3.8820555917975557	-0.5578356617080724	0.31952148694552823	-0.1525432070614446	-4.4648704421198655	-0.2579123559202541	-4.113793324306461	-0.08248260403909984	-4.307326549163702	-3.0713401554771327	-2.7995545588489876	-3.266113558088809	-1.9649660340364106	-4.137571266066611	-2.243918937313471	-3.5385343094318347	-2.8480930353936595	0.01986894249233132	-1.5539851953589525	0.059818684413299926	0.11321422203916426	1.1132890030840425	-0.47514084865888845	-1.4135520339220071	-0.09235970348057478	-1.6079618974059797	0.2799639530149018	-2.860061015951882	-0.9644521965612862	-0.7214436541105796	-1.73672318856167	-1.9836964847214515	0.736824296952018	-3.64013768944663	-3.7577282445455302	-0.2016008693755029	-3.622422194396425	-2.832365732453735
CTT	-3.5202655471920528	-1.4273779393243224	0.7945126577023031	0.4421639006852482	-4.195406695333282	-0.22138528568287966	-5.153811448708518	-0.21881711186133515	-4.031073172535544	-0.6734448826787621	-0.026965836609206224	-2.7806057423071087	1.2484006675374866	-0.6718353632668842	-0.12912487691791572	-1.8337862171934094	0.585894169091487	0.09682998362845957	-0.5943581499978292	0.3245112386403824	0.6657794519779201	-0.54175942060211	-0.5446669113074987	-1.4135520339220071	-0.3713080959636012	-1.8287497350277304	0.1720753074514518	-4.465630451608062	-1.6042533964159387	-5.0591700298878814	-0.6381108998935604	-0.9540770675402933	0.17784116162655758	-3.6740392411223115	-2.941978741893253	0.4123193410141773	-0.8891945460372244	-3.148218681872212
GAA	-2.341610550850407	-0.28224563502132005	-0.30409963096580667	-0.005899401344426944	3.473634567379513	-0.6874750156074789	2.503943822426347	-0.06540748216469934	0.9162672711883981	-0.6734448826787621	-2.329550929603252	-3.099059473425643	0.7373988478411658	-3.4444240855066655	-1.5829520093046703	-2.7500769490675645	-2.442627927285495	-0.05112392966128732	-0.8136374955652097	0.07319681035947616	1.3589266325378655	0.1969982712098875	-0.291471014926887	1.8584336162601423	-0.017136282242987355	2.646468080163194	-0.43807877652309896	0.6173255040678198	1.5230552349267714	-3.2863930115721165	-3.036006172691931	-2.1172278773459743	-2.425677120388443	-2.911899189075415	0.8866626545958425	-2.9387536534654095	0.38126799955754476	-1.5796027639583665
GAC	0.14329609893759349	0.41090154553862523	0.8353346522225581	-0.5339668315449237	-4.125516359123764	-1.6683042686192053	-1.0933684381620985	-0.08351872190444466	0.4462636419426626	-3.312502212294021	-0.026965836609206224	-2.898388777963492	-0.09600275187324399	-4.137571266066611	-2.285106495720086	-1.8337862171934094	-2.154945854833714	-0.3761151749473894	-1.597660258861614	0.3245112386403822	-0.12745118713900766	0.1969982712098875	-0.5446669113074987	-0.7204048533620618	0.413646633849467	-3.2039767895079394	0.09204959949742024	2.696767045747656	-0.3583163929909707	0.040696397936317026	-3.203060257355097	-1.241759139992074	-3.834444337360392	-0.9659890400201016	-2.724255258048382	-2.9387536534654095	-0.5097049243323205	-0.6633120320842116
GAG	-3.1525407670667356	-0.7311958550692234	0.19474980175346818	-0.10652281671798422	-3.9540448183538746	-0.30499942572401323	-1.786515618722044	0.0625098537826753	3.975072148197464	0.6387415062874067	-3.3591703467844103	-2.821427736827364	-0.11871356378732145	-1.3494783572908642	-2.0288388969808437	-3.4093225779518286	-3.318096664639395	-0.10982367382502582	-1.5230493950704393	0.7299763467485467	-0.027367728582025224	0.7948352719655079	-0.4385604053129509	1.9697076470534811	0.20155291872184233	-2.4623772255620473	0.233592631527044	-2.444896510755004	-1.051463573550916	-0.36476871017184737	-2.4298703691216152	-1.4240806967860289	-0.08085552680147039	-3.530938397481638	-2.4091742114084864	0.4540754785262292	-0.024197108550619646	-3.6337264976539125
GAT	-3.3976632250997203	-1.1985363668954752	0.2327014792034447	0.36890087999709054	-4.144416310254248	-0.22138528568287966	-0.4394419707554348	-0.13302986173477072	2.9415330787662093	3.745395725117836	1.9318477172820148	-2.647074349682586	-0.7404516758048357	0.09377089675649884	-1.9813108893245388	4.625074395753227	1.3805638644360354	-0.12706800001123553	-1.4536748508112065	0.47866191846764056	-0.23793249768937472	0.1969982712098875	-0.3980634371156234	1.6309704038014157	-0.6457449416653612	-2.661111811997332	0.17484156094434178	-3.739383322621772	1.6565866275512944	-1.5249388918393905	-3.4106996221333414	0.3676787724420261	-1.449167528521233	-4.383715723633467	-2.724255258048382	-1.3293157410313095	-0.31187918100240053	2.859365247115653
GCA	-3.467621813706631	-1.1801872282272785	-1.0071971423789203	1.1146917940424577	-2.3337568898957084	-1.1983006393734694	-2.4796627992819893	-0.0465533173618072	-2.0386430078453377	-2.976029975672808	-0.026965836609206224	-3.0037492936213184	-1.8426417858208295	-1.572621908605074	0.5640223036420295	-1.8337862171934094	-0.13254413820032857	-0.8403323227307803	-1.0331304561237624	-0.5917794932337728	-0.7205149091419706	-0.8638736894753751	-0.21330977535305623	-2.5121643225901167	0.5582278626605747	-0.6916711655318246	-0.2819168415513731	-4.358545797592096	-0.6459984654427515	-5.04425092912449	-2.7175524415733965	-1.5418637324424125	-2.425677120388443	-2.064601328688211	-3.430825458940468	-2.9387536534654095	0.38126799955754476	-4.113299577915799
GCC	0.14329609893759349	-1.786323031797594	1.3053382814682937	-0.6770676751855972	-4.09474470045701	0.27760588043610823	-2.4796627992819893	-0.2902828814095368	-0.940030719177228	-4.434644998372325	-3.118008289967522	-1.7997764892953823	-1.142059626773366	-4.137571266066611	-0.27020347517782123	-1.8337862171934094	-3.1357751078454403	0.35486079394310976	-0.9759720422838137	-0.2351045492950404	-0.027367728582025224	0.1969982712098875	-0.5446669113074987	-2.9176294306982813	0.27054579020879377	-0.6916711655318246	0.3097128146299138	1.598154757079546	0.04714871511719382	1.0703158151174752	-2.024405261013451	-1.5782313766132872	-3.2858783856115545	-0.9659890400201016	-0.9050968146322124	-2.9387536534654095	0.38126799955754476	-5.151948401816352
GCG	-1.8026140501177197	-1.1413779530555266	-0.0485208038984432	-0.414703410718106	-0.6290087976572833	-0.7928355312653051	-3.578275087950099	-0.1670558447159662	-4.031073172535544	-4.605270515403088	-3.3591703467844103	-2.598284185513154	-0.4155254301806836	-4.137571266066611	-2.121555041608122	-2.932398505861519	-3.5412402159536045	-0.08956222418070577	-1.226428322395692	-0.24188423628041905	0.48345789518396537	1.9887577404379424	-0.2569848388557177	-4.186140756161788	0.13701439758427114	-0.6916711655318246	-2.073676310779428	-1.4141068184256556	-1.8987614339381194	0.040696397936317026	-1.73672318856167	-1.7425344279045634	-0.08142507054998928	-3.0454305816999376	-0.9050968146322124	-0.8184901172653186	0.38126799955754476	-2.914603830690707
GCT	-3.257901282724562	-0.9753928155812653	-1.2069673425078211	0.7092266859342935	-4.905674916673338	-0.3665672955273774	-0.9755854025057151	-0.271974703871509	-0.2468835386172827	-0.6734448826787621	-1.8187253058372612	-3.3402215302425313	-1.1241767972765944	-4.137571266066611	-1.0332203356982526	-1.140639036633464	-2.6249494840794494	-0.21341022888506037	-1.504569835795602	-0.18631438512560836	-0.20325839504568946	-0.3709857663960518	-0.40156606766682557	-2.799846395041898	0.27054579020879377	-0.6916711655318246	-2.3100650888436585	0.9050075765196008	0.04714871511719382	0.37716863455752997	-3.582549879060001	-3.0335186092201294	0.026285373680203426	-3.0454305816999376	-0.21194963407226708	1.1042976143691405	-2.183681357903992	-2.6092221811395246
GGA	-3.9510484632845073	-0.28224563502132005	0.022422274802238053	0.25724156219123623	2.9671612583523856	0.337029300906909	0.9860731035177371	-0.04462430772769218	-0.940030719177228	-2.7015931299710476	-3.4927017394089326	-3.8792180309752182	1.5398634628291734	-1.8707533969311962	-2.1745342418810645	-3.3919308352399593	0.1774002853211619	-0.1620131504404527	-1.1668773427691599	0.3935041101273336	-0.7205149091419706	1.1778275242216136	1.4099163190012434	-2.552986317110372	0.18353441321916392	-1.097136273639989	0.11533466801940245	1.598154757079546	1.9706419852579649	-1.2322692778765705	-2.83533547722978	-1.9836964847214515	0.040095574813013575	-2.7577485092481564	1.5963391371069982	0.6988325062609761	-0.6263725109048383	-3.841365862432157
GGC	-1.242998262182297	-1.3330672598530813	-0.4752478871616361	0.6666670715154976	-3.6937339426982256	0.35984397867308016	-4.228862654091248	-0.08035851742924546	-4.811231730085119	-3.381495083780972	-1.8187253058372612	-4.102361582289428	-1.9002116376423073	-1.2715168158211525	-3.275104116818692	-4.359514861501665	-0.27690201700864636	-0.08416619192442627	-1.250014721642276	-0.6971400088915989	-0.8158250889462955	1.6633353400033146	-7.552267525259352	-3.811447306720378	-0.40154798115331936	-2.888895742868044	0.07984717189483045	2.696767045747656	0.2702922664314037	0.37716863455752997	-3.277168229508819	-2.5226929854541384	-5.576857932485292	-0.9659890400201016	-2.5145347270663128	0.6570353775825147	-4.037572608239053	-3.8293896713854414
GGG	-4.94430023629479	-0.9020102696472414	-0.11086156243050163	-0.11745188725017444	-4.124137999153642	-0.7094539223262543	-2.4796627992819893	0.02339288042246151	-3.3677789551252797	-2.0233715996277777	-4.580842728209747	-3.8279247365876676	0.6574078440697345	-1.2364839943573205	-2.149209256202178	-3.8375159371375487	0.19757619144627014	0.1560493432884308	-1.4283589822415432	0.3925647018853979	0.5048490851652829	0.7250657014103842	1.2678725264123016	-2.6993758646782635	0.7405494194545295	-3.176577815319825	-0.4505611730378741	-1.1533805559624029	0.6349353800193128	-1.0579158907317927	-5.819894450185646	-1.6133226964245573	0.005396551107246384	-4.1848648648883024	-3.693189723407959	-1.0669514765638184	-3.1516072060798104	-3.0546926238613885
GGT	-3.663366390832726	-1.1457381813285041	-0.24647051812917048	0.38380428549966555	-4.624913287066132	-0.9751570880592599	-4.460664268148573	-0.030707420637324866	-2.549468631611328	2.354456673808621	1.5558924380201822	-4.572365211535163	1.409023861870362	-0.31574652855661345	-1.5913743487790262	-0.1730550103717585	-0.8331900148513945	-0.3303911953402573	-2.0394930111406535	-0.5917794932337728	0.12678295124523298	1.295610559877997	-0.4472927472823225	-2.666315002417375	-0.09235970348057478	-1.9444341340271927	0.18886128108534211	1.3104726846277652	0.5058771859314467	-0.1534596165046404	-3.203060257355097	-1.8295458048941933	-0.06918676255819478	-3.450895689808102	-3.544154144247471	-1.3293157410313095	-0.01498045344569569	-3.148218681872212
GTA	-2.6292926233021876	-0.6877107431294844	0.08609800501156915	-0.14298518925533912	-0.6621610049741836	-0.013745920904635126	-0.5055817732599798	0.05674861131705052	-3.8844696983436684	-0.6734448826787621	-1.1255781252773158	-3.645603179793713	1.2006430279822435	-3.4444240855066655	-0.9230767565998267	-3.3919308352399593	-2.2884772474582364	0.029180960117949697	-0.4120365932038746	-0.3260763275007671	-0.151420377252004	0.010412315629475385	-0.019400603386713754	-3.0229899463561076	-1.0644552765235464	-1.7563819025242529	0.11322438321515549	-4.720813356666889	-1.4925196267617828	-2.195443595649576	-1.3312580804535057	-1.8295458048941933	-2.4701288829592767	-3.450895689808102	-1.8213875465063678	-0.9928435044100965	-3.67051694824576	-3.6918341284611933
GTC	-3.467621813706631	0.41090154553862523	0.1421874716626128	-0.11745188725017457	-3.507229737770935	0.054462329121898516	-3.1728099798419347	0.13635221225774785	-3.080096882673499	-0.6734448826787621	-2.666023166224465	-3.186070850415273	-1.8113892423167248	-1.4932368793505084	-2.4084103260839087	-3.4432241296275095	-2.154945854833714	-0.04702529233769903	-1.1166875982453046	0.3245112386403822	-0.09968839016165146	1.63208279649921	-0.5446669113074987	-4.275752914851475	-0.036938909539166995	-2.547969155897451	-0.14333067826522639	-2.8206858507170516	-0.8001491452700097	-1.033818339152732	-3.7291533532518764	-2.2890781342726334	-1.6372197600241727	-3.7992023840763176	-2.4943320197487937	-0.1305739861229258	0.38126799955754476	-3.7988062480133613
GTG	-4.378492478111447	-0.9240995211937149	0.34648793517534265	0.2224159383721767	-4.297954036870403	-0.19499853050968471	-3.1728099798419347	0.10242193165872995	-3.2426158121712736	-2.813511046175033	-3.1624600525383557	-4.1669001034269995	-1.2026044305748325	-1.3719512131429226	-2.6779610962363205	-4.751556949277688	-3.1357751078454403	-0.2434131742653888	-1.2138879753647094	-0.11942015029557823	-0.6559763880043992	-0.11587405007045196	-0.15318804517407436	-3.9392806782302623	-0.42260139035115174	-1.6901999956429519	0.2289087822146177	-4.574241492533337	-0.9644521965612862	-3.710486939513774	-2.024405261013451	-2.340371428660184	0.11669653759467816	-3.9617213135740923	-2.8510069636875257	-0.051234964551651385	-3.749890535787272	-2.189368335579261
GTT	-1.8026140501177197	-1.1985363668954752	-0.40946014662363306	0.2032910474624946	-4.52364006037356	-0.3773200873036393	-2.8851279073901535	0.30801326854479105	-2.4441081159535023	-3.6691771562327533	-2.5118724863972064	-3.9970010666316016	-1.3403268517227473	-2.597126225119462	-1.0208744998759531	-4.8542111033377715	-0.10301751170160359	-0.2530774313056967	-1.2147694727919887	0.11687187386213788	-0.466734388365871	-0.01619494925115421	-0.7145659481028962	-4.0526093635372655	0.5272656370566077	-2.9603547068501888	0.30451689282028827	-4.612445319945107	-1.4993313471644252	-1.3806892829948436	-2.247548812327661	-1.8295458048941933	-0.4506386984101059	-3.363884312818472	-4.3550843604638	-0.22185383708621695	-3.041908288823386	-3.061207304882582
TAA	-1.4661418134965067	0.41090154553862523	-0.17276362890471975	-0.3405954385643843	1.8268166428298753	-0.46433146429326916	-1.0933684381620985	-0.7180537470319995	-0.940030719177228	-0.6734448826787621	-0.026965836609206224	-2.7806057423071087	-1.249937388291729	-4.137571266066611	1.0647975915545187	-1.140639036633464	-2.8480930353936595	-0.09847986404194438	0.8227078697888152	1.0176584192003275	-0.027367728582025224	0.1969982712098875	-0.5446669113074987	-0.02725767280211657	0.27054579020879377	4.120513189840593	0.1611512413356589	2.696767045747656	1.1770135472894079	-5.028656939705792	-2.7175524415733965	-0.597402123601561	-1.126394136258182	-3.5809488180562994	2.5485988089354334	-2.9387536534654095	0.38126799955754476	-0.5091613522569531
TAC	0.8364432794975388	0.41090154553862523	-0.5272431822800165	0.30376157782612917	-3.0116365983248654	0.18229570063178338	-2.76734487173377	0.0856243122106016	2.963960114553654	-0.6734448826787621	-0.026965836609206224	-0.2956990925191084	-1.5082725993963952	-4.137571266066611	-0.18223470223186408	-1.8337862171934092	0.05607204463484115	-0.2727352071648779	-1.056393609594388	-0.3686359419195631	-0.02736772858202534	0.1969982712098875	-0.5446669113074987	-0.7204048533620618	0.27054579020879377	-2.13859014846815	-0.9750640221113184	2.696767045747656	0.04714871511719382	-0.691843184334289	-2.7175524415733965	-0.7309335162260836	-1.414076208709963	-0.9659890400201016	-0.9050968146322124	-2.9387536534654095	0.38126799955754476	3.964923426834876
TAG	4.545737918354068	3.3265077746133316	0.30991022903541476	0.12855748880103837	-4.331919782575477	-0.22258648702851375	1.3515328770122024	-0.22869865959645902	1.1394108225026078	-2.6593603663477743	-2.329550929603252	-1.2119898243932634	-2.5964135881972097	-4.137571266066611	-1.3591197866070517	-4.436475902637794	-4.23438739651355	-0.08253736126806355	-1.513778774880912	-1.7549303030394536	-0.2637565066462556	0.42014182252409726	-0.1578939362114869	-0.7204048533620618	0.27054579020879377	-1.0663646149732353	0.2587824868732443	2.696767045747656	-1.156824089208742	-1.033818339152732	-2.5840210489488737	-0.03778633566613819	-0.6155685124921912	-3.6285768670455543	-1.8213875465063676	0.5289334694655786	0.38126799955754476	-2.7427535737640474
TAT	-2.8271183666321074	-0.6877107431294844	0.20672599280018406	-0.41923856588349734	-3.6591424979286065	-0.3997929431556979	-2.811019935236432	0.1169885735207739	-1.6331778997371733	-0.6734448826787621	-1.5310432333854802	-1.9539271691226408	-2.202644519852236	-3.4444240855066655	-1.7993062395210357	-2.31929403297511	-2.2884772474582364	0.09270059028644824	-1.2839035772429488	-1.9780738543536633	-0.027367728582025224	-0.49614890935005784	1.0647710011266016	-0.02725767280211657	-0.24027983355719704	1.8420256484256077	-1.1901754017282637	1.598154757079546	2.7925864482910243	-2.4382400848651793	-3.3461611009957704	-1.5418637324424125	-1.6372197600241727	-3.530938397481638	-0.7425778851344378	0.25991946408527167	1.4798802882256543	-1.4052493768135887
TCA	-3.3532114625288867	0.41090154553862523	-0.35966948212061756	0.016079505374348147	0.05344309378591411	0.4911799807341672	-2.1919807268302085	-0.23204977643982275	-0.940030719177228	-0.6734448826787621	-3.4113560999549803	-2.310602113061373	-0.7440294971527197	-4.137571266066611	-1.109954129929642	-1.140639036633464	-1.7494807467255495	0.03145655766471899	-1.3222482790016474	-0.3686359419195631	-0.027367728582025224	0.1969982712098875	-0.5446669113074987	-0.7204048533620618	0.27054579020879377	-0.6916711655318246	-0.058773290237163406	2.0036198651877104	-1.4253233422437492	-0.5783428104699063	-0.6381108998935604	-2.5226929854541384	-1.126394136258182	-0.9659890400201016	-0.4996317065240482	-2.9387536534654095	0.38126799955754476	-1.7619243207523212
TCC	0.14329609893759349	-0.7369817921362672	-0.08095607965159704	-0.6770676751855972	-0.6290087976572833	-0.28200990749931465	-3.578275087950099	0.0894176390764507	-0.2468835386172827	-0.6734448826787621	-0.7201130171691515	-1.3943113811872179	-1.0063937616202108	-4.137571266066611	1.9810883234286738	-1.140639036633464	-4.23438739651355	-0.07852290384940197	-1.7518109386888725	0.3245112386403822	-0.027367728582025224	0.1969982712098875	-0.5446669113074987	-0.7204048533620618	0.27054579020879377	-0.6916711655318246	0.02823808675246632	2.696767045747656	0.7402958956771392	1.9866065469916305	-0.6381108998935604	-1.6472242481002386	-1.126394136258182	-0.9659890400201016	-0.21194963407226708	-2.9387536534654095	0.38126799955754476	-1.7619243207523212
TCG	-3.1148004390838886	-0.6877107431294844	-0.38925743930611345	-0.4406788971213668	-1.7276210863253931	0.4111372730606308	-0.17707770628794356	0.05993652904110762	-0.940030719177228	-0.6734448826787621	-3.245841661477407	-2.898388777963492	-1.6194982345066196	-4.830718446626556	-2.7094947404075476	-3.5385343094318347	-1.3440156386173852	-0.034587345994213155	-1.6250592330497284	0.4422942742967658	-1.6368056410161256	0.1969982712098875	-0.36469553185849773	-1.4135520339220071	0.27054579020879377	-0.6916711655318246	0.22327496449636158	2.696767045747656	-1.5785031910517258	0.4825291502153563	-1.3312580804535057	-1.4240806967860289	-1.2317546519160083	-3.9617213135740923	-2.0037091033003223	-2.9387536534654095	0.38126799955754476	-3.148218681872212
TCT	-2.6292926233021876	-1.2754974080316033	0.8128617963704997	-1.0825327832937615	-4.050008806615619	-0.12785922767205615	-2.702806350596199	0.28339479318246247	-2.3263250802971185	-3.1583515324667624	-0.026965836609206224	-2.310602113061373	-2.1791140224420427	-4.137571266066611	-1.9653361087168046	-1.140639036633464	-4.23438739651355	-0.17196517116932183	0.5995643184746053	0.3245112386403822	-0.027367728582025224	-0.208466836898277	0.5539453773606109	-0.7204048533620618	-0.28906999772662884	-0.6916711655318246	1.3275210708827272	2.0036198651877104	-1.3391456460026967	-0.028296473550634357	-0.6381108998935604	-1.9836964847214515	-1.6372197600241727	-3.6050463696353603	-2.776898991533804	-0.31615760090422307	0.38126799955754476	-2.7835755682843026
TGA	-2.5647541021646165	-0.6877107431294844	-0.5817313675640863	-0.5592846395292137	-1.5763901166014693	-0.4610581389483	2.2966556429019316	-0.14341667270769445	-1.8273339141781308	-4.544645893586653	-0.026965836609206224	-3.7456866383506955	0.003184904677501264	-3.4444240855066655	-2.5806523046320815	-2.9864657271317947	-3.1357751078454403	-0.03443894301239011	-1.790726354938546	-0.2885932342460267	-0.027367728582025224	0.8901454517698328	-0.4111355186829761	-3.5237652342685966	0.08822423341483901	1.6109139274622208	0.22890878221461752	-1.1318743507414393	1.6664667361510013	-4.766831371606149	-2.5840210489488737	-1.6472242481002386	-2.592731205051609	-2.064601328688211	2.062464581955082	-1.552459292345519	-0.31187918100240053	-2.0496063932041024
TGC	-2.8524361746163973	-0.8418614229567428	-0.8048749188782959	-0.08928101028347812	-4.259552674758256	-0.6874750156074789	-4.389205304166428	-0.0833244906311794	-2.932460883867434	-1.5384423201653668	-2.860179180665422	-2.898388777963492	0.515771756726158	-4.830718446626556	0.9694874117501939	-1.8337862171934094	-2.2884772474582364	-0.19684799390518093	-1.5898047589213053	1.4231235273084921	-0.027367728582025224	0.1969982712098875	-0.5446669113074987	-3.9392806782302623	-0.6945351058347933	-3.2566205229933614	0.3097128146299138	2.696767045747656	0.04714871511719382	0.7338435784962624	-4.351682966597869	-1.8295458048941933	-2.225006424926292	-0.9659890400201016	-3.302992087430583	-2.9387536534654095	3.6771048655618737	-1.8672848364101475
TGG	-3.467621813706631	-1.5350086035166879	-0.034436064016704	-0.1291025044701497	-3.981050094550693	0.9707530609960535	-1.5241513542545528	0.06758985561647836	-2.731790188405283	-3.0713401554771327	-3.651306769585571	-4.338750360353658	-0.032533177924577786	-1.4321912935202794	-2.4246141469304923	-4.436475902637794	-0.16792803778098483	-0.12724971472919291	-1.4203575331796023	0.0017378463773312183	-0.027367728582025224	1.3756532675515336	-0.5184971935741141	-5.744285374208339	-0.4576927101624217	-1.38481834609177	-0.20373906048734902	0.9050075765196008	1.299911683612562	-0.09283499468820548	-4.681162167728111	-3.082308773389561	0.0999725214575281	-3.530938397481638	-3.2323745202166294	-2.022462921591255	-1.3479711126891762	-2.629424888457044
TGT	-3.570275967766714	0.41090154553862523	0.08536513579591659	0.42154461348251243	-4.713043990220522	-0.28200990749931465	0.6496008668965243	-0.02942805119090013	-0.940030719177228	-1.7030642998599204	-4.137839700782518	-3.266113558088809	1.4751029414686903	-1.834986173072565	-1.5525982412795605	-3.337863613969683	-0.65086845805744	-0.11856873167037096	-1.8427827168945992	0.5068327954343369	0.17330296688012595	-0.3138273525561033	-0.511566962881154	-3.6327555179770017	-0.8280664984593159	-1.7902834541999344	-1.1573855789052732	-2.139514861203822	-0.24053335733458706	-2.7626639829702175	-3.203060257355097	-1.6472242481002386	0.7685495692051038	-3.8376686649041134	-3.444070685690489	0.07945147594063984	4.50555202637828	-3.2535791975300383
TTA	-2.421653258523943	-0.28224563502132005	-0.08095607965159704	-0.04579589834373931	-4.450377434817298	0.031647651355727176	-4.228862654091248	-0.24389210763760008	-4.577616878903614	-2.465204351906817	-0.026965836609206224	-2.647074349682586	-1.4524441498434535	-4.137571266066611	-1.7385627893520161	-1.8337862171934094	-4.23438739651355	-0.10631492117906034	-1.1921951507534496	-0.2632754262617367	-0.027367728582025224	-1.0715130542536195	0.20910489106888133	-2.9176294306982813	0.27054579020879377	0.0014760150281206794	-0.2364544674746157	1.3104726846277652	-1.6532609755226333	-5.58974703962904	-3.582549879060001	-2.052689356208403	-0.027781847590072337	-1.6591362205800468	-3.045162978128483	-2.9387536534654095	0.38126799955754476	-4.246830970540321
TTC	0.14329609893759349	-0.7285327376497395	-0.5272431822800165	-1.0825327832937615	-4.431960708031068	-0.5051534588135242	-1.0133257304885623	0.09399235994283975	-0.2468835386172827	-3.6691771562327533	-0.026965836609206224	-2.647074349682586	-0.6209694043954926	-4.137571266066611	-0.21613625390754557	-3.848689237735674	-3.1357751078454403	-0.6056849469350858	-2.1084858826276047	-0.3686359419195631	-1.4136620897019159	0.1969982712098875	-0.5446669113074987	-1.4135520339220071	0.27054579020879377	-0.8739927223257793	1.8871368588181499	2.696767045747656	-0.6459984654427515	-0.875594333937838	-1.3312580804535057	-2.4356816084645088	-0.7209290281500177	-2.3522834011399922	-0.21194963407226708	-1.0210143813767927	0.38126799955754476	-2.609222181139525
TTG	-3.748524199173033	-0.008952300021638713	-0.331007083885731	0.29479290784336876	-4.1861984802933465	-0.11949097800153959	-2.4345423640015196	-0.10327157778786877	-2.549468631611328	-3.381495083780972	-2.860179180665422	-4.1669001034269995	-0.8946023556320941	-4.137571266066611	-2.3161970827901173	-3.848689237735674	-4.23438739651355	-0.16577121959147276	-1.427872438214916	0.10136768732617249	-0.027367728582025224	-0.09068380124189344	-0.5221940554554402	-3.4929935756018433	0.4781851549870382	-2.4834306347598796	-0.1514826883414308	-4.4040848631963945	-1.547000504801816	-2.3441267932947008	-4.732455462115661	-2.1172278773459743	0.23284342347419532	-4.415976585851689	-2.7921664636645924	-0.6092611075514396	-2.1036386502304554	-4.424512147777774
TTT	-3.652193090234601	-1.302896382219718	0.15037305624905223	-0.3332961360827726	-4.195406695333282	0.14287328646595154	-2.1919807268302085	0.03853965526690823	-4.254216723849754	-2.465204351906817	-1.4132601977290968	-3.645603179793713	-0.4563474247009387	-1.655755808848283	-2.6994985018441717	-2.526933397753355	-2.2884772474582364	-0.08264662103326395	-0.7867300426452853	0.5609000167046126	-0.027367728582025224	0.8901454517698328	-0.5446669113074987	-2.1066992144819525	-0.8688884929795709	-2.8664228870159856	0.2992895789764173	-2.534341571106931	-0.9336805378945323	-4.805176555738086	-3.277168229508819	-2.1172278773459743	0.1119800947850865	-1.6591362205800468	-2.1578597831275808	-0.9928435044100965	-0.5350227323166102	-4.0972992365693575
