# Supplementary material for: Measuring the tolerance of the genetic code to altered codon size
Source: eLife journal article supplement (doi:10.7554/elife.76941), 2022-03-16
Supplement: supp [file elife-76941-supp-v1.zip › elife_poa_e76941_Figure_6_source_data_1.csv]

qtRNA	qtRNA plasmid	measured on/ see tab	Mean	Std
Q-CAAA	GlnU-CAAA	Original Kinetic Lum	0.106	0.036
E-AGGG	pAB193e1	4/20/19 LacZ firstbatch	0.755	0.252
E-CGAG	pAB193e2	4/20/19 LacZ firstbatch	0.28	0.137
E-AGGC	pAB193e3	4/20/19 LacZ firstbatch	-0.018	0.067
E-CGGT	pAB193e4	4/20/19 LacZ firstbatch	4.985	0.761
Y-CCAT	pAB193y1	4/20/19 LacZ firstbatch	0.127	0.049
Y-CATG	pAB193y2	4/20/19 LacZ firstbatch	-0.38	0.178
Y-TACA	pAB193y3	4/20/19 LacZ firstbatch	0.182	0.039
Y-CCCT	pAB193y4	4/20/19 LacZ firstbatch	-0.041	0.146
Y-CCTC	pAB193y5	4/20/19 LacZ firstbatch	-0.002	0.042
Y-CCCC	pAB193y6	4/20/19 LacZ firstbatch	-0.093	0.099
Y-AAGC	pAB193y7	4/20/19 LacZ firstbatch	-0.048	0.065
Y-CAAG	pAB193y8	4/20/19 LacZ firstbatch	0.127	0.102
A-TAGA	pED14xA-1	12/24/19	-0.026	0.048
A-TAGA	pED14xA-1	4/18/19 XYZZ B1	0.07	0.063
A-GCCC	pED14xA-2	12/23/19	#DIV/0!	#DIV/0!
A-GCCC	pED14xA-2	4/18/19 XYZZ B1	#DIV/0!	#DIV/0!
A-AGGG	pED14xA-3	7/1/19	0.315	0.048
A-AGGG	pED14xA-3	5/27/20	0.433	0.108
A-GGGT	pED14xA-4	7/1/19	#DIV/0!	#DIV/0!
A-CAGG	pED14xA-5	7/1/19	0.127	0.06
A-GGGG	pED14xA-6	7/7/19	#DIV/0!	#DIV/0!
C-TAGA	pED14xC-1	12/24/19	0.234	0.229
C-TAGA	pED14xC-1	12/28/19	0.224	0.066
C-TAGA	pED14xC-1	5/30/20	0.165	0.074
C-TAGA	pED14xC-1	4/18/19 XYZZ B1	0.167	0.106
C-TGCC	pED14xC-2	12/23/19	#DIV/0!	#DIV/0!
C-TGCC	pED14xC-2	4/18/19 XYZZ B1	-0.277	#DIV/0!
C-CGGC	pED14xC-3	7/7/19	0.897	0.136
C-CGGC	pED14xC-3	9/10/20	0.734	0.559
C-CGGT	pED14xC-4	7/7/19	0.08	0.02
D-TAGA	pED14xD-1	12/24/19	-0.069	0.129
D-TAGA	pED14xD-1	4/18/19 XYZZ B1	-0.151	0.044
D-GACC	pED14xD-2	12/23/19	-0.46	#DIV/0!
D-GACC	pED14xD-2	12/28/19	-0.626	0.257
D-GACC	pED14xD-2	4/18/19 XYZZ B1	-0.791	0.277
D-AGGG	pED14xD-3	5/27/20	0.067	0.057
D-CGGC	pED14xD-5	5/28/20	0.083	0.063
D-CGGC	pED14xD-5	9/10/20	0.319	0.25
E-TAGA	pED14xE-1	12/24/19	0.256	0.155
E-TAGA	pED14xE-1	12/28/19	0.287	0.021
E-TAGA	pED14xE-1	4/18/19 XYZZ B1	0.434	0.088
E-GAAA	pED14xE-2	12/23/19	-1.135	#DIV/0!
E-GAAA	pED14xE-2	12/28/19	-1.196	0.209
E-GAAA	pED14xE-2	4/18/19 XYZZ B1	-1.957	0.578
E-AGGG	pED14xE-3	7/1/19	0.719	0.032
E-AGGG	pED14xE-3	5/27/20	1.38	0.164
E-AGGG	pED14xE-3	9/10/20	1.205	0.121
E-AGGA	pED14xE-4	7/7/19	3.065	0.307
E-CGGT	pED14xE-5	2/26/20	3.96	0.266
E-CGGT	pED14xE-5	5/28/20	4.328	0.257
F-TAGA	pED14xF-1	12/2/19	0.15	0.02
F-TAGA	pED14xF-1	12/24/19	0.095	0.136
F-TAGA	pED14xF-1	5/30/20	0.088	0.065
F-TAGA	pED14xF-1	4/18/19 XYZZ B2	0.187	0.061
F-TTCC	pED14xF-2	12/23/19	-0.078	0.111
F-TTCC	pED14xF-2	4/18/19 XYZZ B2	-0.029	0.03
F-TACA	pED14xF-3	7/7/19	0.102	0.011
F-TACA	pED14xF-3	5/28/20	0.089	0.019
F-TACA	pED14xF-3	9/10/20	0.099	0.015
F-TACA	pED14xF-3	11/20/20	0.128	0.021
F-CGGC	pED14xF-4	7/7/19	2.346	0.177
F-CGGC	pED14xF-4	5/28/20	1.842	0.107
F-CGGC	pED14xF-4	9/10/20	1.4	0.317
F-CGGC	pED14xF-4	11/20/20	3.03	0.102
F-CGGT	pED14xF-6	7/7/19	0.102	0.037
G-TAGA	pED14xG-1	12/2/19	0.14	0.041
G-TAGA	pED14xG-1	12/24/19	0.293	0.1
G-TAGA	pED14xG-1	9/10/20	0.419	0.063
G-TAGA	pED14xG-1	4/18/19 XYZZ B2	0.261	0.047
G-GGGG	pED14xG-2	12/23/19	2.121	0.836
G-GGGG	pED14xG-2	12/28/19	1.434	0.396
G-GGGG	pED14xG-2	2/26/20	1.33	0.348
G-GGGG	pED14xG-2	4/18/19 XYZZ B2	2.44	0.281
G-AGGG	pED14xG-3	7/1/19	1.232	0.089
G-AGGG	pED14xG-3	5/27/20	2.152	0.388
G-AGGG	pED14xG-3	9/10/20	1.968	0.368
H-TAGA	pED14xH-1	12/2/19	0.185	0.031
H-TAGA	pED14xH-1	12/24/19	0.405	0.055
H-TAGA	pED14xH-1	5/30/20	0.27	0.025
H-TAGA	pED14xH-1	4/18/19 XYZZ B2	0.294	0.086
H-CACC	pED14xH-2	12/23/19	#DIV/0!	#DIV/0!
H-CACC	pED14xH-2	4/18/19 XYZZ B2	#DIV/0!	#DIV/0!
H-AGGG	pED14xH-3	7/1/19	6.217	0.225
H-AGGG	pED14xH-3	9/10/20	5.105	3.15
H-AGGG	pED14xH-3	11/20/20	7.462	4.98
H-AGGT	pED14xH-4	7/7/19	0.622	0.09
H-TACA	pED14xH-5	7/7/19	0.108	0.005
H-TACA	pED14xH-5	5/28/20	0.097	0.01
H-TACA	pED14xH-5	9/10/20	0.083	0.057
H-CAGT	pED14xH-6	7/7/19	#DIV/0!	#DIV/0!
I-TAGA	pED14xI-1	12/24/19	-0.062	0.043
I-TAGA	pED14xI-1	4/18/19 XYZZ B2	-0.033	0.046
I-ATCC	pED14xI-2	12/23/19	-0.024	0.065
I-ATCC	pED14xI-2	4/18/19 XYZZ B2	-0.006	0.044
I-AGGA	pED14xI-3	7/1/19	1.064	0.102
I-AGGG	pED14xI-4	5/30/20	0.04	0.017
K-TAGA	pED14xK-1	12/24/19	-0.007	0.057
K-TAGA	pED14xK-1	4/18/19 XYZZ B1	0.002	0.037
K-AAAA	pED14xK-2	12/23/19	-0.019	0.043
K-AAAA	pED14xK-2	4/18/19 XYZZ B1	-0.034	0.042
K-AGAA	pED14xK-3	7/1/19	0.345	0.032
K-AGAA	pED14xK-3	2/26/20	0.286	0.037
L-TAGA	pED14xL-1	12/24/19	-0.087	0.033
L-TAGA	pED14xL-1	4/18/19 XYZZ B2	0.017	0.023
L-TTGG	pED14xL-2	12/23/19	-0.002	0.005
L-TTGG	pED14xL-2	4/18/19 XYZZ B2	0.009	0.009
L-AGGG	pED14xL-5	7/1/19	0.405	0.06
L-AGGG	pED14xL-5	5/27/20	0.328	0.053
M-TAGA	pED14xM-1	7/7/19	0.005	0.007
M-TAGA	pED14xM-1	12/24/19	0.008	0.005
M-TAGA	pED14xM-1	4/18/19 XYZZ B2	-0.073	0.046
M-ATGG	pED14xM-2	7/7/19	0.086	0.013
M-ATGG	pED14xM-2	12/23/19	#DIV/0!	#DIV/0!
M-ATGG	pED14xM-2	4/18/19 XYZZ B2	#DIV/0!	#DIV/0!
M-AGGG	pED14xM-4	7/7/19	0.983	0.092
M2-TAGA	pED14xM2-1	7/7/19	-0.052	0.022
M2-TAGA	pED14xM2-1	12/24/19	-0.069	0.022
M2-ATGG	pED14xM2-2	7/7/19	-0.001	0.006
M2-ATGG	pED14xM2-2	12/23/19	0.001	0.006
M2-AGGG	pED14xM2-3	5/27/20	5.427	0.185
M3-TAGA	pED14xM3-1	7/7/19	-0.098	0.019
N-TAGA	pED14xN-1	12/24/19	-0.039	0.047
N-TAGA	pED14xN-1	4/18/19 XYZZ B2	-0.05	0.049
N-AACC	pED14xN-2	7/1/19	-0.051	0.031
N-AACC	pED14xN-2	12/23/19	-0.071	0.022
N-AACC	pED14xN-2	4/18/19 XYZZ B2	0.018	0.034
N-AGGG	pED14xN-3	7/1/19	-0.03	0.038
N-AGGA	pED14xN-4	7/1/19	0.169	0.042
N-CGGT	pED14xN-5	7/1/19	-0.069	0.041
N-TACA	pED14xN-6	7/1/19	-0.005	0.002
N-CAGG	pED14xN-7	7/1/19	-0.058	0.03
N-AATT	pED14xN-8	7/1/19	-0.055	0.012
N-AAAT	pED14xN-9	7/1/19	-0.107	0.025
P-TAGA	pED14xP-1	12/24/19	-0.029	0.099
P-TAGA	pED14xP-1	3/6/20	-0.073	0.022
P-TAGA	pED14xP-1	4/18/19 XYZZ B2	-0.003	0.038
P-CCGG	pED14xP-2	12/2/19	0.233	0.036
P-CCGG	pED14xP-2	12/23/19	0.381	0.043
P-CCGG	pED14xP-2	2/26/20	0.371	0.042
P-CCGG	pED14xP-2	3/6/20	0.237	0.037
P-CCGG	pED14xP-2	4/18/19 XYZZ B2	0.27	0.075
Q-TAGA	pED14xQ-1	4/19/19	0.888	0.14
Q-TAGA	pED14xQ-1	12/24/19	0.935	0.111
Q-TAGA	pED14xQ-1	4/18/19 XYZZ B1	0.997	0.276
Q-CAGG	pED14xQ-2	12/2/19	#DIV/0!	#DIV/0!
Q-CAGG	pED14xQ-2	12/23/19	1.231	0.263
Q-CAGG	pED14xQ-2	2/26/20	#DIV/0!	#DIV/0!
Q-CAGG	pED14xQ-2	4/18/19 XYZZ B1	0.725	0.45
R-TAGA	pED14xR-1	4/19/19	1.884	0.779
R-TAGA	pED14xR-1	12/24/19	1.609	0.599
R-TAGA	pED14xR-1	4/18/19 XYZZ B2	2.144	0.327
R-CGTT	pED14xR-2	12/23/19	0.613	0.057
R-CGTT	pED14xR-2	12/28/19	-0.014	0.049
R-CGTT	pED14xR-2	2/26/20	#DIV/0!	#DIV/0!
R-CGTT	pED14xR-2	4/18/19 XYZZ B2	1.03	0.123
R-AGGG	pED14xR-5	7/1/19	1.808	0.266
R-AGGT	pED14xR-6	7/7/19	0.333	0.055
R-CGGT	pED14xR-7	7/7/19	4.327	1.415
S-TAGA	pED14xS-1	4/24/19	0.412	0.035
S-TAGA	pED14xS-1	12/2/19	0.515	0.029
S-TAGA	pED14xS-1	12/24/19	0.959	0.301
S-TAGA	pED14xS-1	1/4/20	1.063	0.292
S-TAGA	pED14xS-1	5/30/20	0.701	0.042
S-TAGA	pED14xS-1	9/10/20	1.402	0.107
S-TAGA	pED14xS-1	4/18/19 XYZZ B1	1.269	0.199
S-TCGG	pED14xS-2	12/2/19	0.228	0.025
S-TCGG	pED14xS-2	12/23/19	0.09	0.047
S-TCGG	pED14xS-2	2/26/20	0.045	0.02
S-TCGG	pED14xS-2	9/10/20	-0.092	0.056
S-TCGG	pED14xS-2	4/18/19 XYZZ B1	0.142	0.032
S-AGGG	pED14xS-5	7/1/19	6.926	0.315
S-AGGG	pED14xS-5	5/27/20	11.783	1.707
S-AGGG	pED14xS-5	9/10/20	6.4	2.763
S-GCAT	pED14xS-6	7/7/19	-0.095	0.05
S-CGGC	pED14xS-7	7/7/19	14.817	0.474
S-TACA	pED14xS-8	7/7/19	0.236	0.015
S-TACA	pED14xS-8	5/28/20	0.186	0.025
T-TAGA	pED14xT-1	12/24/19	-0.039	0.024
T-TAGA	pED14xT-1	4/18/19 XYZZ B2	0.02	0.017
T-ACGG	pED14xT-2	12/2/19	0.295	0.041
T-ACGG	pED14xT-2	12/23/19	0.245	0.032
T-ACGG	pED14xT-2	2/26/20	0.186	0.046
T-ACGG	pED14xT-2	4/18/19 XYZZ B2	0.32	0.043
T-AGGG	pED14xT-3	7/1/19	0.216	0.051
T-AGGG	pED14xT-3	9/10/20	0.457	0.053
V-TAGA	pED14xV-1	12/24/19	-0.114	0.014
V-TAGA	pED14xV-1	3/6/20	-0.085	0.027
V-TAGA	pED14xV-1	4/18/19 XYZZ B1	-0.17	0.057
V-GTCC	pED14xV-2	12/23/19	#DIV/0!	#DIV/0!
V-GTCC	pED14xV-2	3/6/20	#DIV/0!	#DIV/0!
V-GTCC	pED14xV-2	4/18/19 XYZZ B1	#DIV/0!	#DIV/0!
V-CGGT	pED14xV-4	7/1/19	0.324	0.039
V-CGGC	pED14xV-5	7/1/19	0.264	0.054
V-CGGC	pED14xV-5	9/10/20	0.663	0.103
V2-GTAA	pED14xV2-2	3/6/20	0.022	0.012
W-TAGA	pED14xW-1	12/24/19	0.444	0.082
W-TAGA	pED14xW-1	4/18/19 XYZZ B1	0.437	0.114
W-TGGG	pED14xW-2	12/23/19	#DIV/0!	#DIV/0!
W-TGGG	pED14xW-2	4/18/19 XYZZ B1	#DIV/0!	#DIV/0!
W-AGGG	pED14xW-4	7/1/19	4.259	0.183
W-AGGG	pED14xW-4	2/26/20	3.618	0.116
W-GGGT	pED14xW-5	7/7/19	0.381	0.056
W-GGGT	pED14xW-5	12/28/19	0.398	0.119
W-GGGT	pED14xW-5	9/10/20	0.519	0.287
W-GGGG	pED14xW-6	7/7/19	#DIV/0!	#DIV/0!
Y-TAGA	pED14xY-1	4/19/19	0.868	0.185
Y-TAGA	pED14xY-1	12/24/19	2.11	0.101
Y-TAGA	pED14xY-1	4/18/19 XYZZ B1	2.011	0.203
Y-TAGA	pED14xY-1	4/18/19 XYZZ B2	1.524	0.157
Y-TACC	pED14xY-2	12/23/19	#DIV/0!	#DIV/0!
Y-TACC	pED14xY-2	4/18/19 XYZZ B1	#DIV/0!	#DIV/0!
Y-TACC	pED14xY-2	4/18/19 XYZZ B2	#DIV/0!	#DIV/0!
Y-TACA	pED14xY-4	7/7/19	0.15	#DIV/0!
Y-TACA	pED14xY-4	12/28/19	0.185	0.016
Y-TACA	pED14xY-4	2/26/20	0.157	0.023
Y-TACA	pED14xY-4	5/28/20	0.181	0.013
Y-TACA	pED14xY-4	9/10/20	0.262	0.02
Y-TACA	pED14xY-4	11/20/20	0.291	#DIV/0!
Y-CAGG	pED14xY-5	7/1/19	0.104	0.015
C-TGGC	pED14zC-3	11/21/20	-0.156	0.067
D-GAAC	pED14zD-3	11/21/20	-1.01	0.48
F-TTTC	pED14zF-3	11/21/20	-0.083	0.044
H-CAAC	pED14zH-3	11/21/20	-0.052	0.048
I-ATTC	pED14zI-3	11/21/20	-0.026	0.03
L-TTTG	pED14zL-3	11/21/20	0.004	0.021
M-ATTG	pED14zM2-3	11/21/20	0.002	0.015
N-AAAC	pED14zN-3	11/21/20	-0.096	0.038
P-CCCG	pED14zP-3	11/21/20	3.003	0.256
Q-CAAG	pED14zQ-3	11/21/20	0.572	0.042
R-CGGT	pED14zR-3	11/21/20	#DIV/0!	#DIV/0!
S-TCCG	pED14zS-3	11/21/20	#DIV/0!	#DIV/0!
T-ACCG	pED14zT-3	11/21/20	#DIV/0!	#DIV/0!
V-GTTC	pED14zV-3	11/21/20	-0.004	0.035
Y-TAAC	pED14zY-3	11/21/20	-0.351	0.049
T-ACCA	pED3xT1	4/18/19 XYZZ B1	1.574	0.148
