# Supplementary material for: Measuring the tolerance of the genetic code to altered codon size
Source: eLife journal article supplement (doi:10.7554/elife.76941), 2022-03-16
Supplement: supp [file elife-76941-supp-v1.zip › elife_poa_e76941_Figure_6_source_data_2.csv]

	AGGG	TAGA	TCGG	GGGG	CCGG	CGTT	AGAA	TACA	CAGG	ACGG
Trp-AGGG	3.6298432	-0.066672	0.0137275	-0.066672	0.0278345	-0.0693344	-0.0067549	-0.0137472	0.0116452	0.0190169
G32-His-TAGA	-0.0131667	3.5486336	-0.0121949	-0.0682173	-0.0175017	0.0085016	-0.0218573	-0.0105336	-0.001863	-0.0161437
A32-C38-Ser-TCGG	-0.0584251	0.0119483	1.5326583	-0.0953215	0.0294291	-0.0159535	0.010217	-0.0064151	0.0173683	0.0260526
Gly-GGGG	-0.1276952	-0.1318968	-0.0152505	1.3360052	-0.1781716	-0.1707714	-0.0760706	-0.0372838	-0.1554457	-0.0643168
Pro-CCGG	-0.0760353	-0.0544962	-0.0280615	-0.1771994	0.3719887	-0.0533677	-0.0503584	-0.0240119	-0.0288535	-0.0228942
Arg-CGTT	0.0183145	0.0226717	-0.0466185	-0.0210912	-0.0174102	0.3102669	-0.0645996	-0.0604654	-0.0761237	-0.0018088
Lys-AGAA	-0.0489309	-0.0116825	-0.019274	-0.1270513	-0.0744214	-0.0618606	0.2863516	-0.0469564	-0.0776512	-0.0373011
Tyr-TACA	-0.1593423	-0.1226733	-0.058473	-0.2208861	-0.0933595	-0.1063994	-0.1409067	0.2731673	-0.122829	-0.0521173
Gln-CAGG	-0.01396	-0.0012543	-0.0186497	-0.1086093	-0.009223	-0.0342031	-0.0782075	-0.0145117	0.2467934	-0.0050549
Thr-ACGG	-0.0002027	-0.0130233	-0.0133859	-0.0441211	-0.0217868	-0.0518905	-0.0204951	0.0047487	0.0140998	0.2223197
