# Supplementary figures and images for: Measuring the tolerance of the genetic code to altered codon size
Source: eLife journal article supplement (doi:10.7554/elife.76941), 2022-03-16

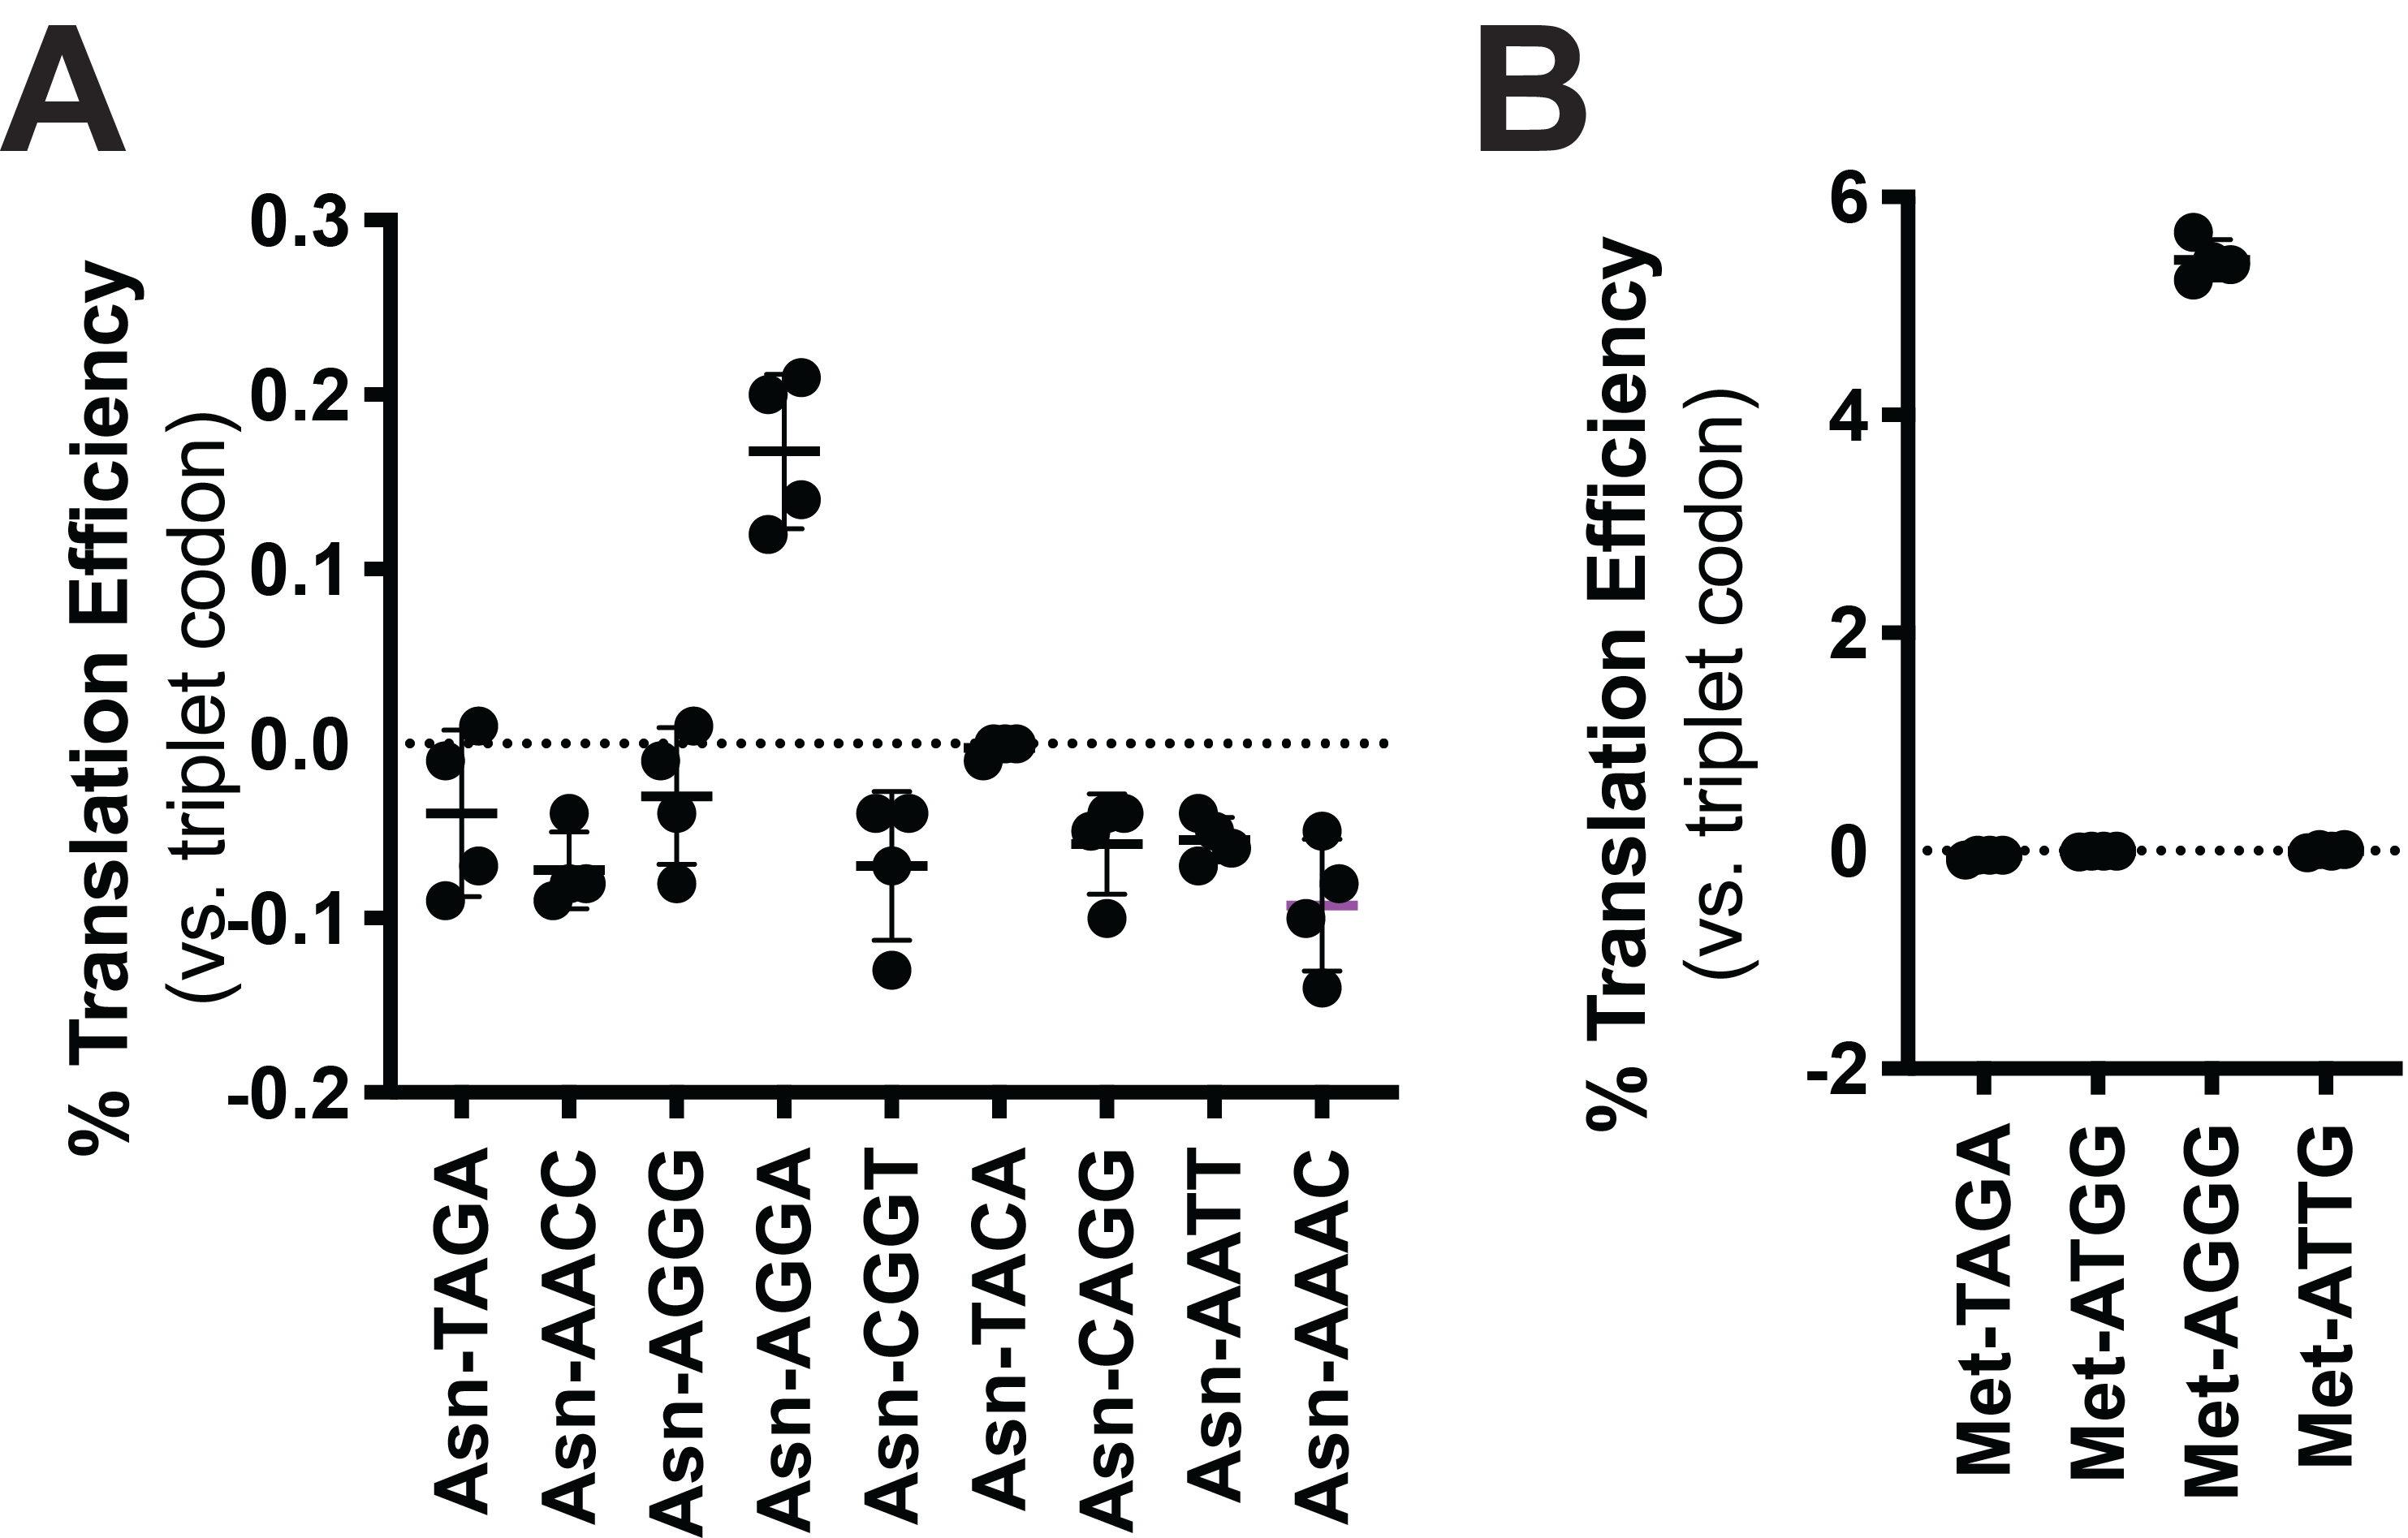

Supplement: supp [file elife-76941-supp-v1.zip › elife_poa_e76941_Figure_1_figure_supplement_1.png]
